# Supplementary material for: Construction of solid–liquid interfacial Fenton-like reaction under visible light irradiation over etched CoxFeyO4–BiOBr photocatalysts
Source: Royal Society of Chemistry journal article supplement (doi:10.1039/c7cy01915g), 2017-12-01
Supplement: c7cy01915g1.pdf [file c7cy01915g1.pdf]

## Supporting information

### Construction of solid-liquid interfacial Fenton-like reaction under visible light irradiation over etched $\text{Co}_x\text{Fe}_y\text{O}_4$ -BiOBr photocatalysts

Ting Zhou,<sup>a</sup> Yuanguo Xu,<sup>\*a</sup> Xiang Wang,<sup>a</sup> Shuquan Huang,<sup>a</sup> Meng Xie,<sup>a</sup> Jiexiang Xia,<sup>a</sup> Liying Huang,<sup>a</sup> Hui Xu,<sup>b</sup> Huaming Li,<sup>\*a,b</sup>

<sup>a</sup> School of Chemistry and Chemical Engineering, School of Pharmacy, Jiangsu University, Zhenjiang 212013, PR China.

<sup>b</sup> Institute for Energy Research, Jiangsu University, Zhenjiang 212013, PR China.

\*E-mail: xuyg@ujs.edu.cn; lhm@ujs.edu.cn

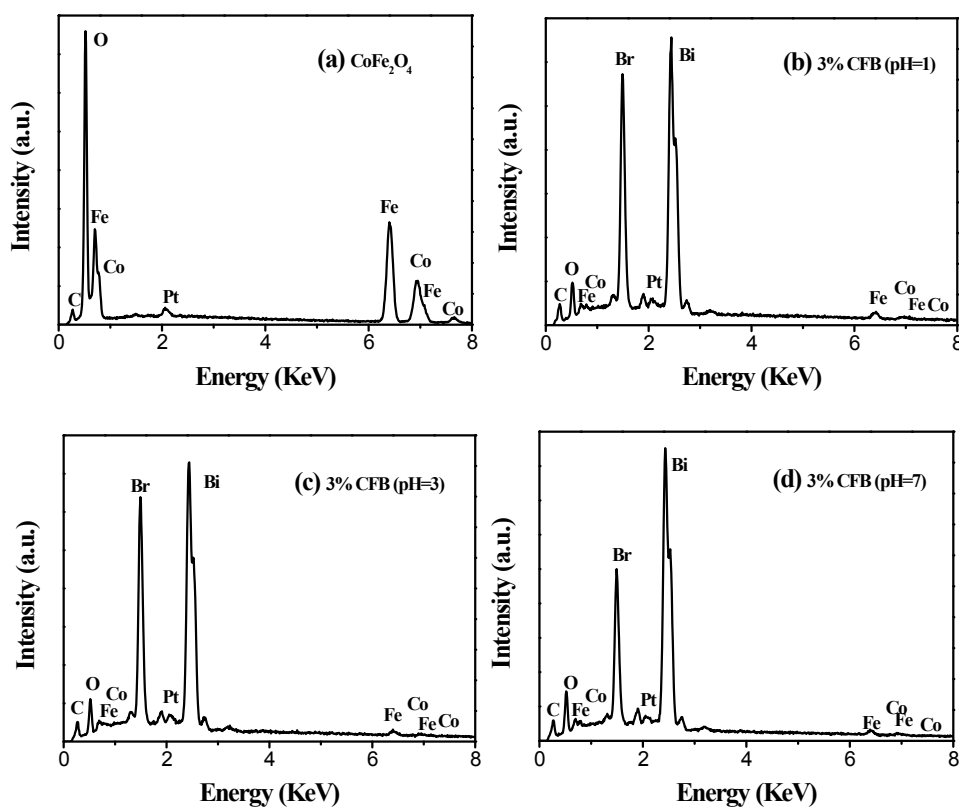

Figure S1. The EDS spectra of  $\text{CoFe}_2\text{O}_4$  (a) and 3% CFB composites with pH=1 (b); pH=3 (c) and pH=7 (d).

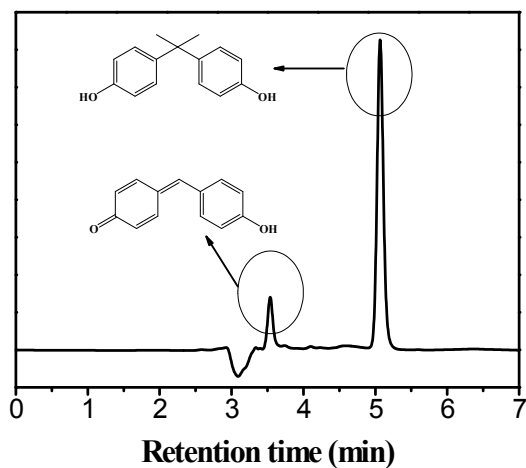

Figure S2. Molecular structure of the BPA and its degradation intermediate products by 0.5% CFB (pH=3) under visible light irradiation.

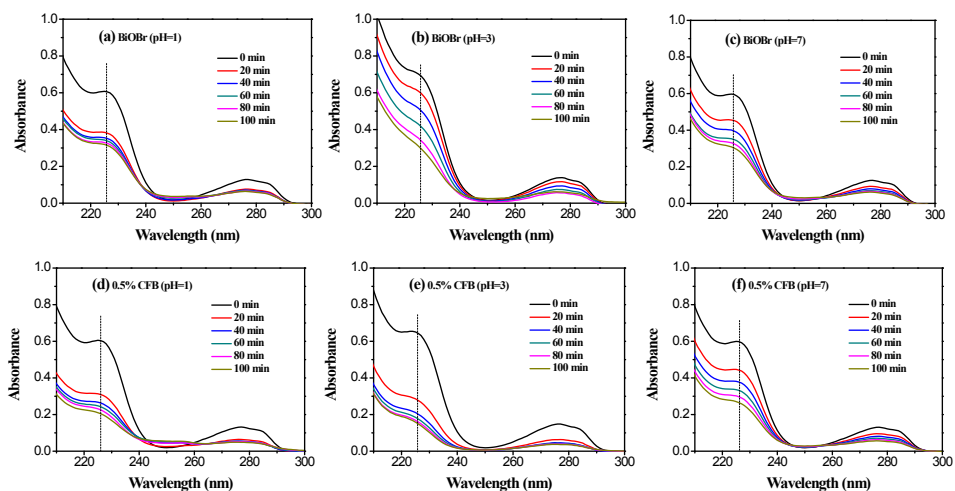

Figure S3. UV-Visible absorption spectra of BPA solution under visible light ( $\lambda \geq 420$  nm) irradiation in the presence of BiOBr and 0.5% CFB (pH=1, 3 or 7).

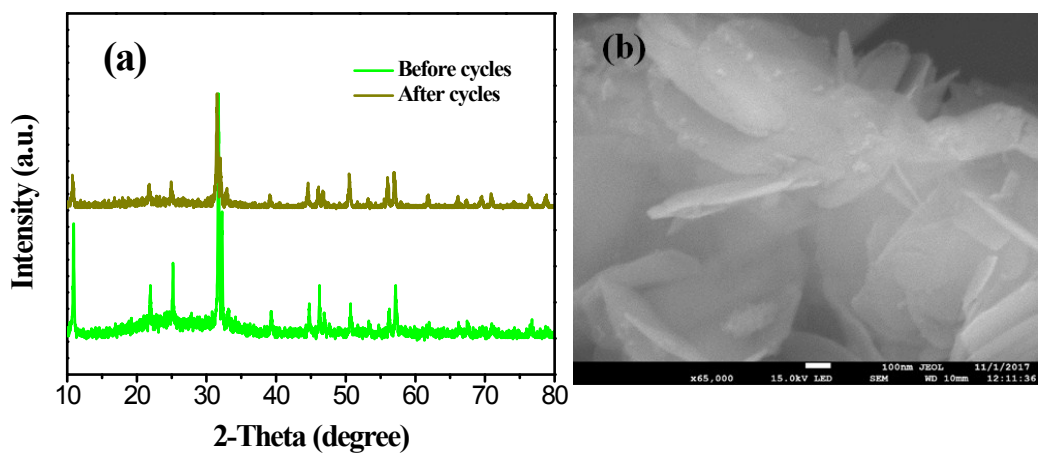

Figure S4. (a) XRD patterns of fresh and cycled 0.5% CFB (pH=3) samples; (b) SEM image of 3% CFB (pH=3) after cycle experiment.
